# Supplementary material for: DNA Repair and Cell Cycle Biomarkers of Radiation Exposure and Inflammation Stress in Human Blood
Source: PubMed Central journal article supplement (PMC3492462; doi:10.1371/journal.pone.0048619), 2012-11-07

Figure S6. Correlation between IL-6 and TNF-alpha responses in LPS treated whole blood cultures.

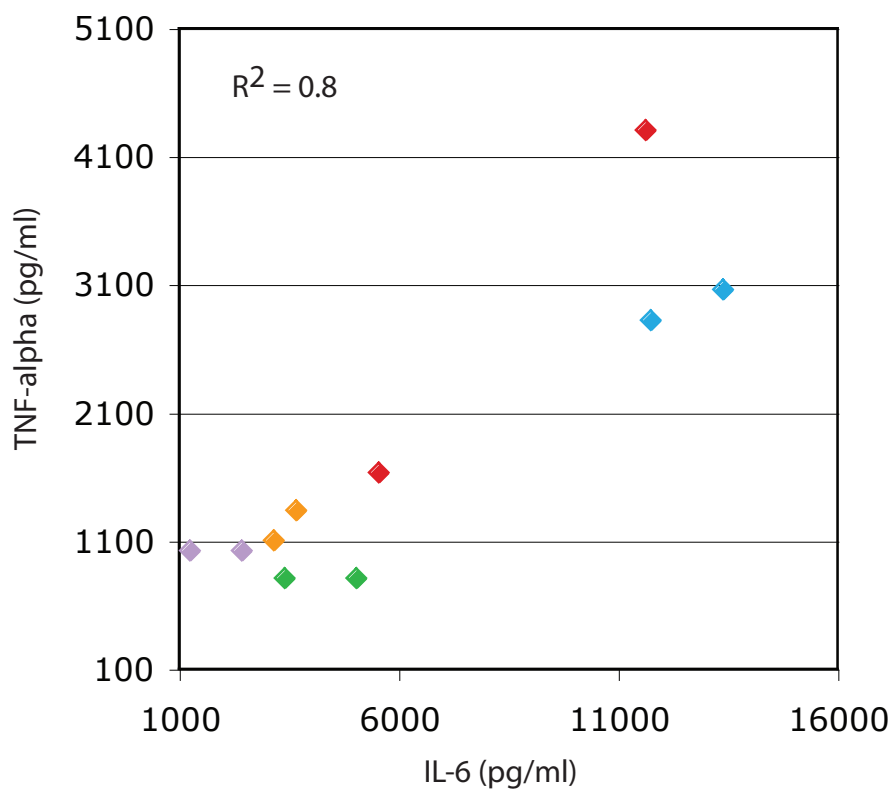

Supplement: pone.0048619.s006.pdf [file pone.0048619.s006.pdf]
